# Supplementary material for: Ligand modulation of sidechain dynamics in a wild-type human GPCR
Source: eLife journal article supplement (doi:10.7554/elife.28505), 2017-10-06
Supplement: supp [file elife-28505-supp-v1.zip]

Archive with 10 entries (10 files):
- elife_poa_e28505_Figure_2_figure_supplement_1.jpg
- elife_poa_e28505_Figure_1_figure_supplement_1.jpg
- elife_poa_e28505_Figure_1_figure_supplement_2.jpg
- elife_poa_e28505_Figure_2_figure_supplement_2.pdf
- elife_poa_e28505_Figure_2_figure_supplement_3.pdf
- elife_poa_e28505_Transparent_Reporting_File.pdf
- elife_poa_e28505_Source_Data_File:_NMR_chemical_shift_data.zip
- elife_poa_e28505_Figure_3_figure_supplement_1.pdf
- elife_poa_e28505_Figure_5_figure_supplement_1.pdf
- elife_poa_e28505_Figure_6_figure_supplement_1.pdf
