# Supplementary figures and images for: Ligand modulation of sidechain dynamics in a wild-type human GPCR
Source: eLife journal article supplement (doi:10.7554/elife.28505), 2017-10-06

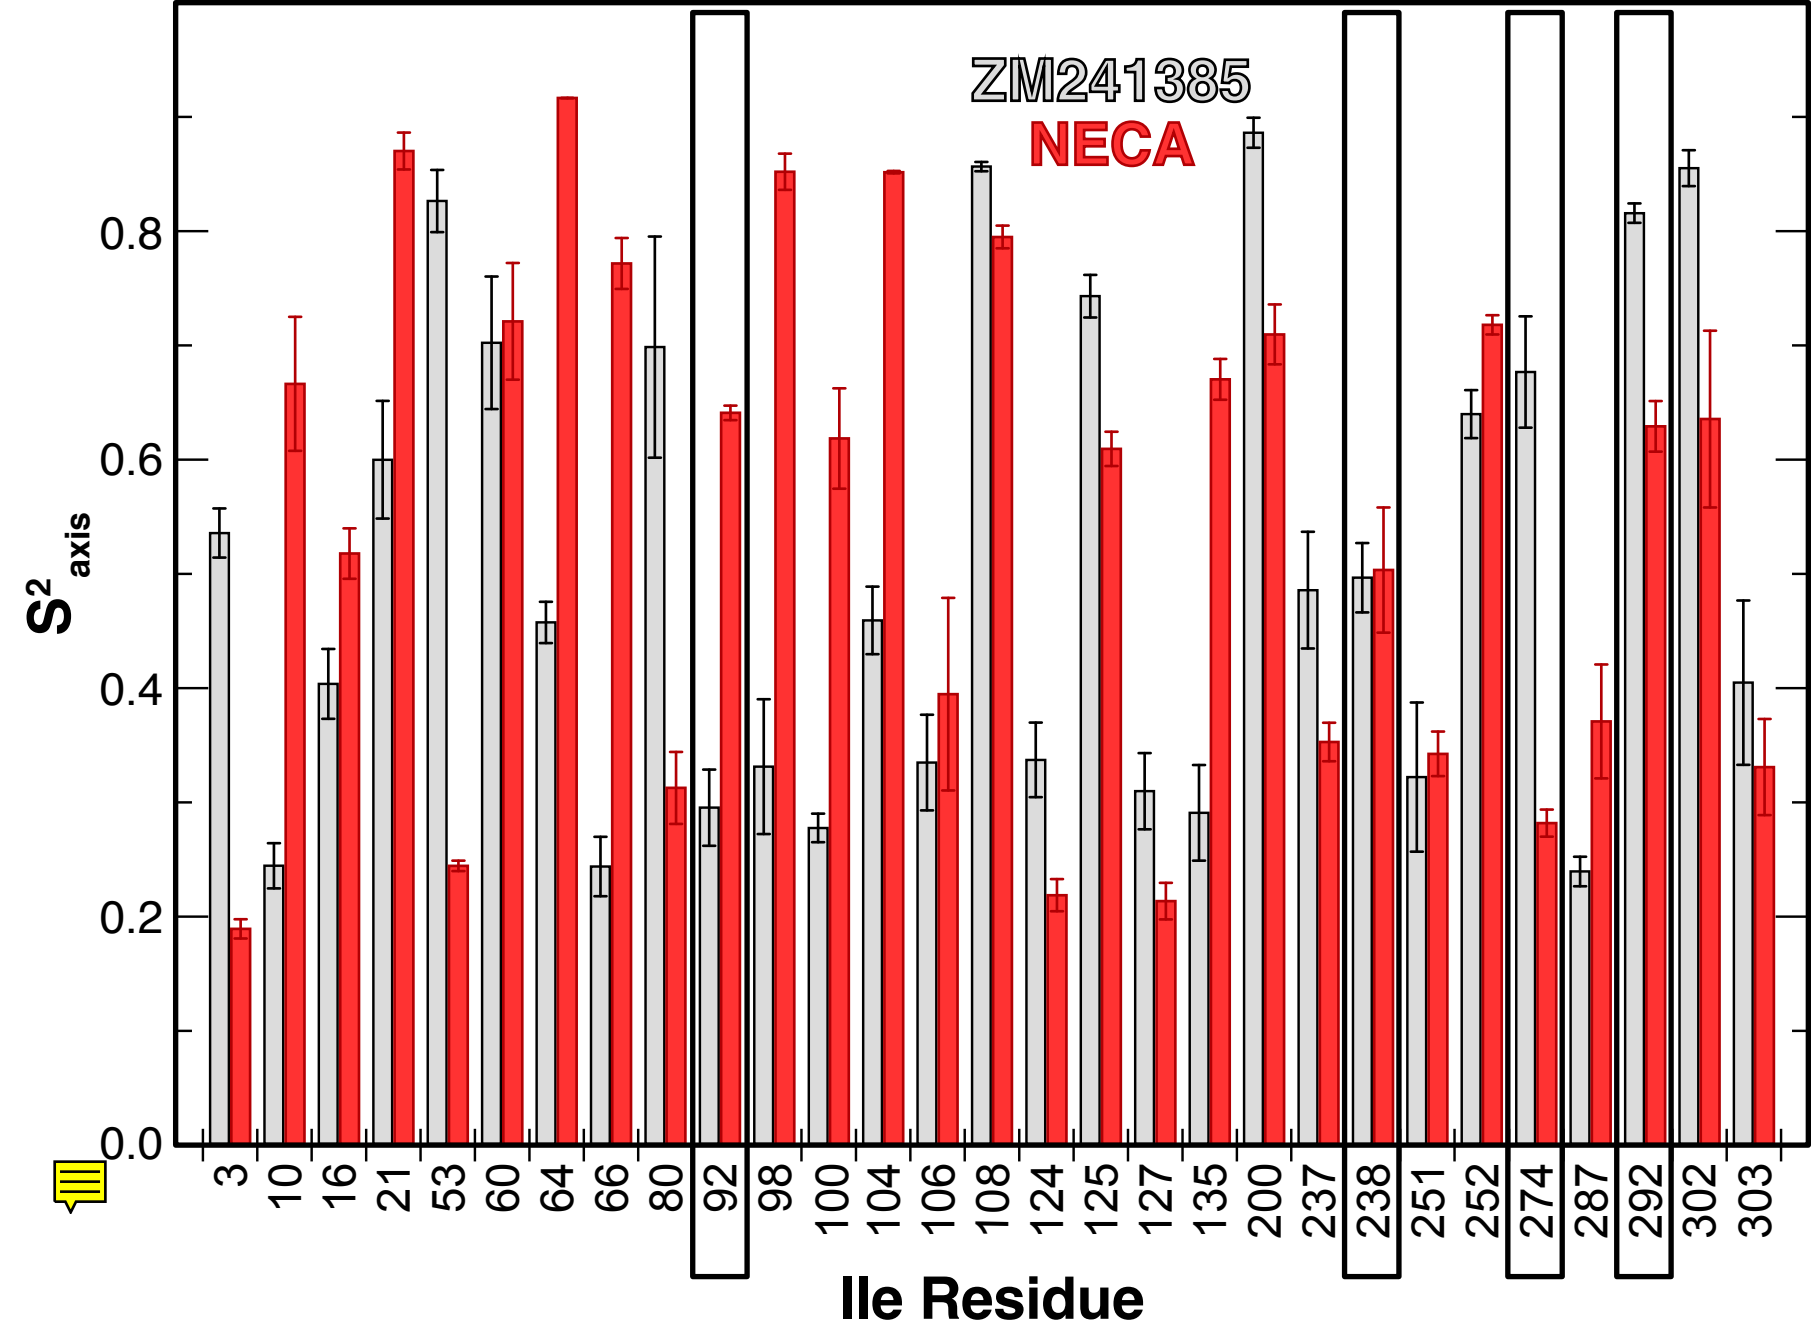

Supplement: supp [file elife-28505-supp-v1.zip]

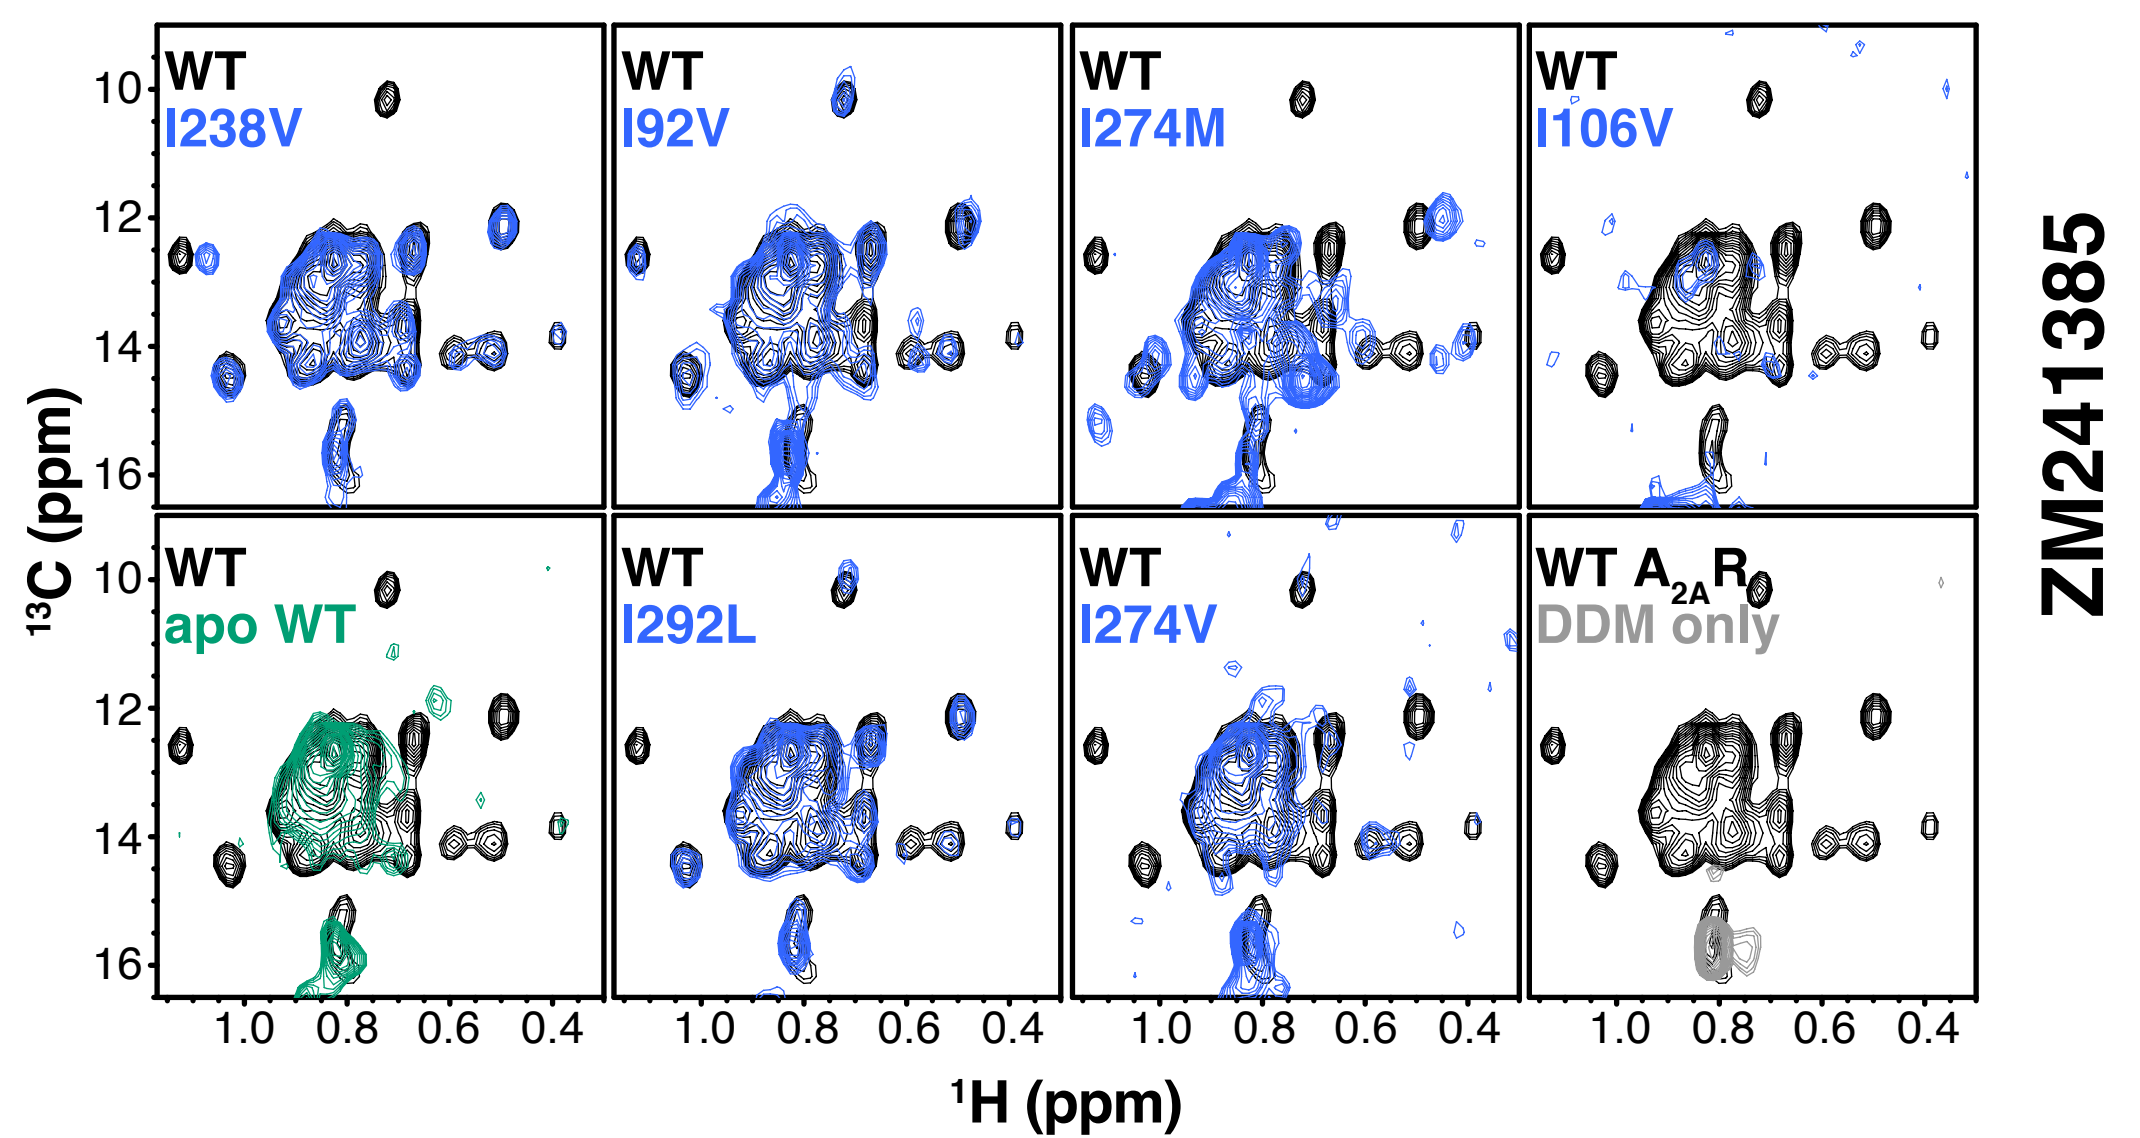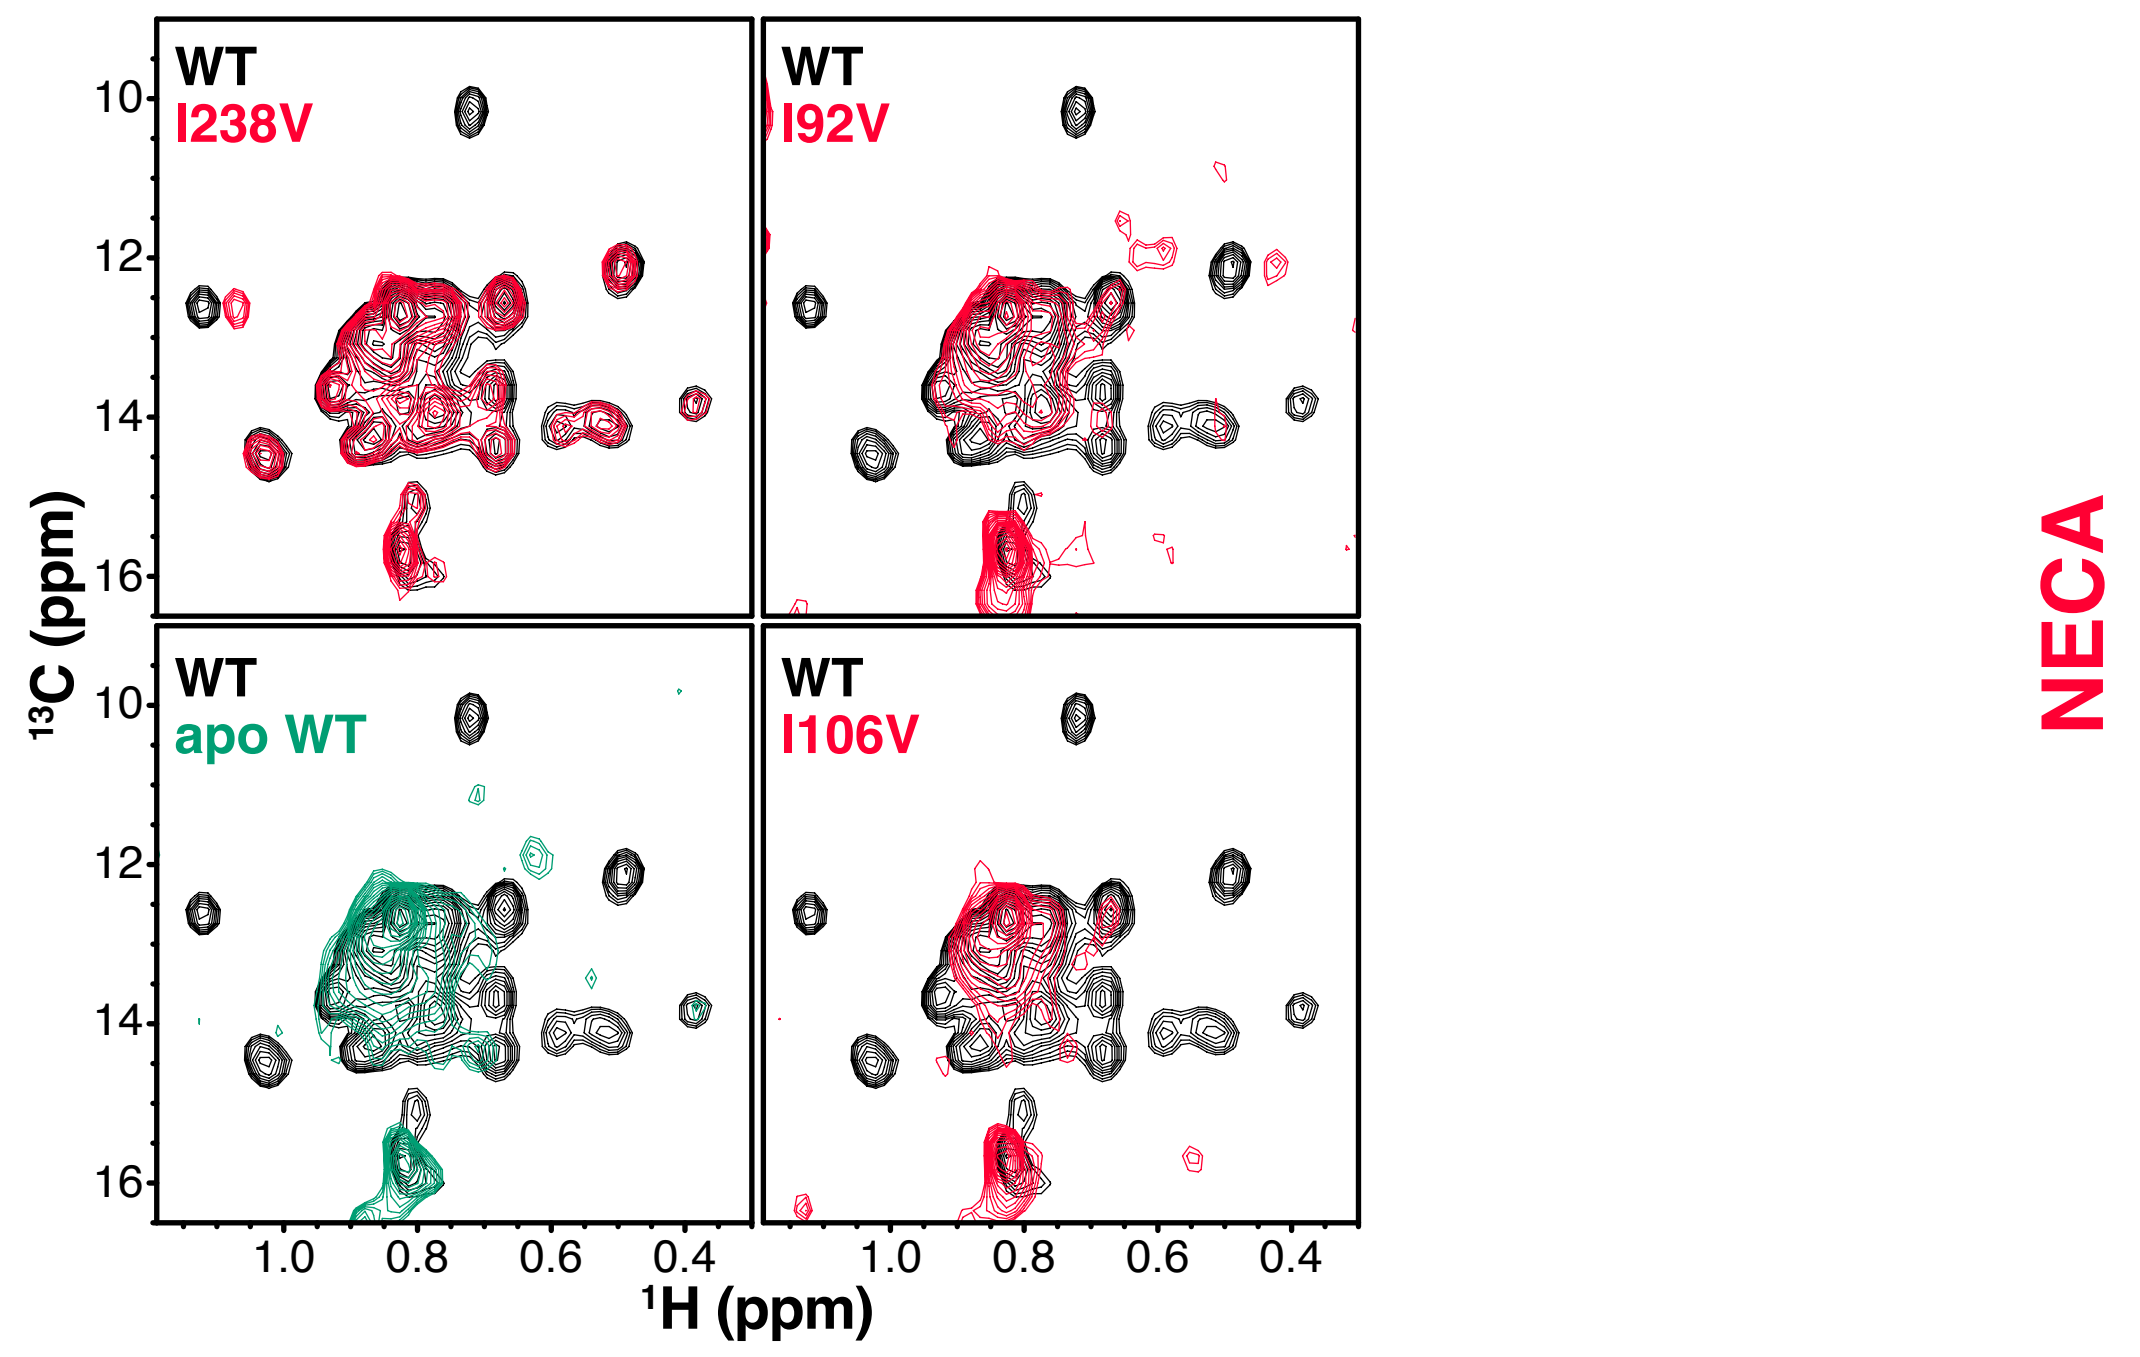

Supplement: supp [file elife-28505-supp-v1.zip]

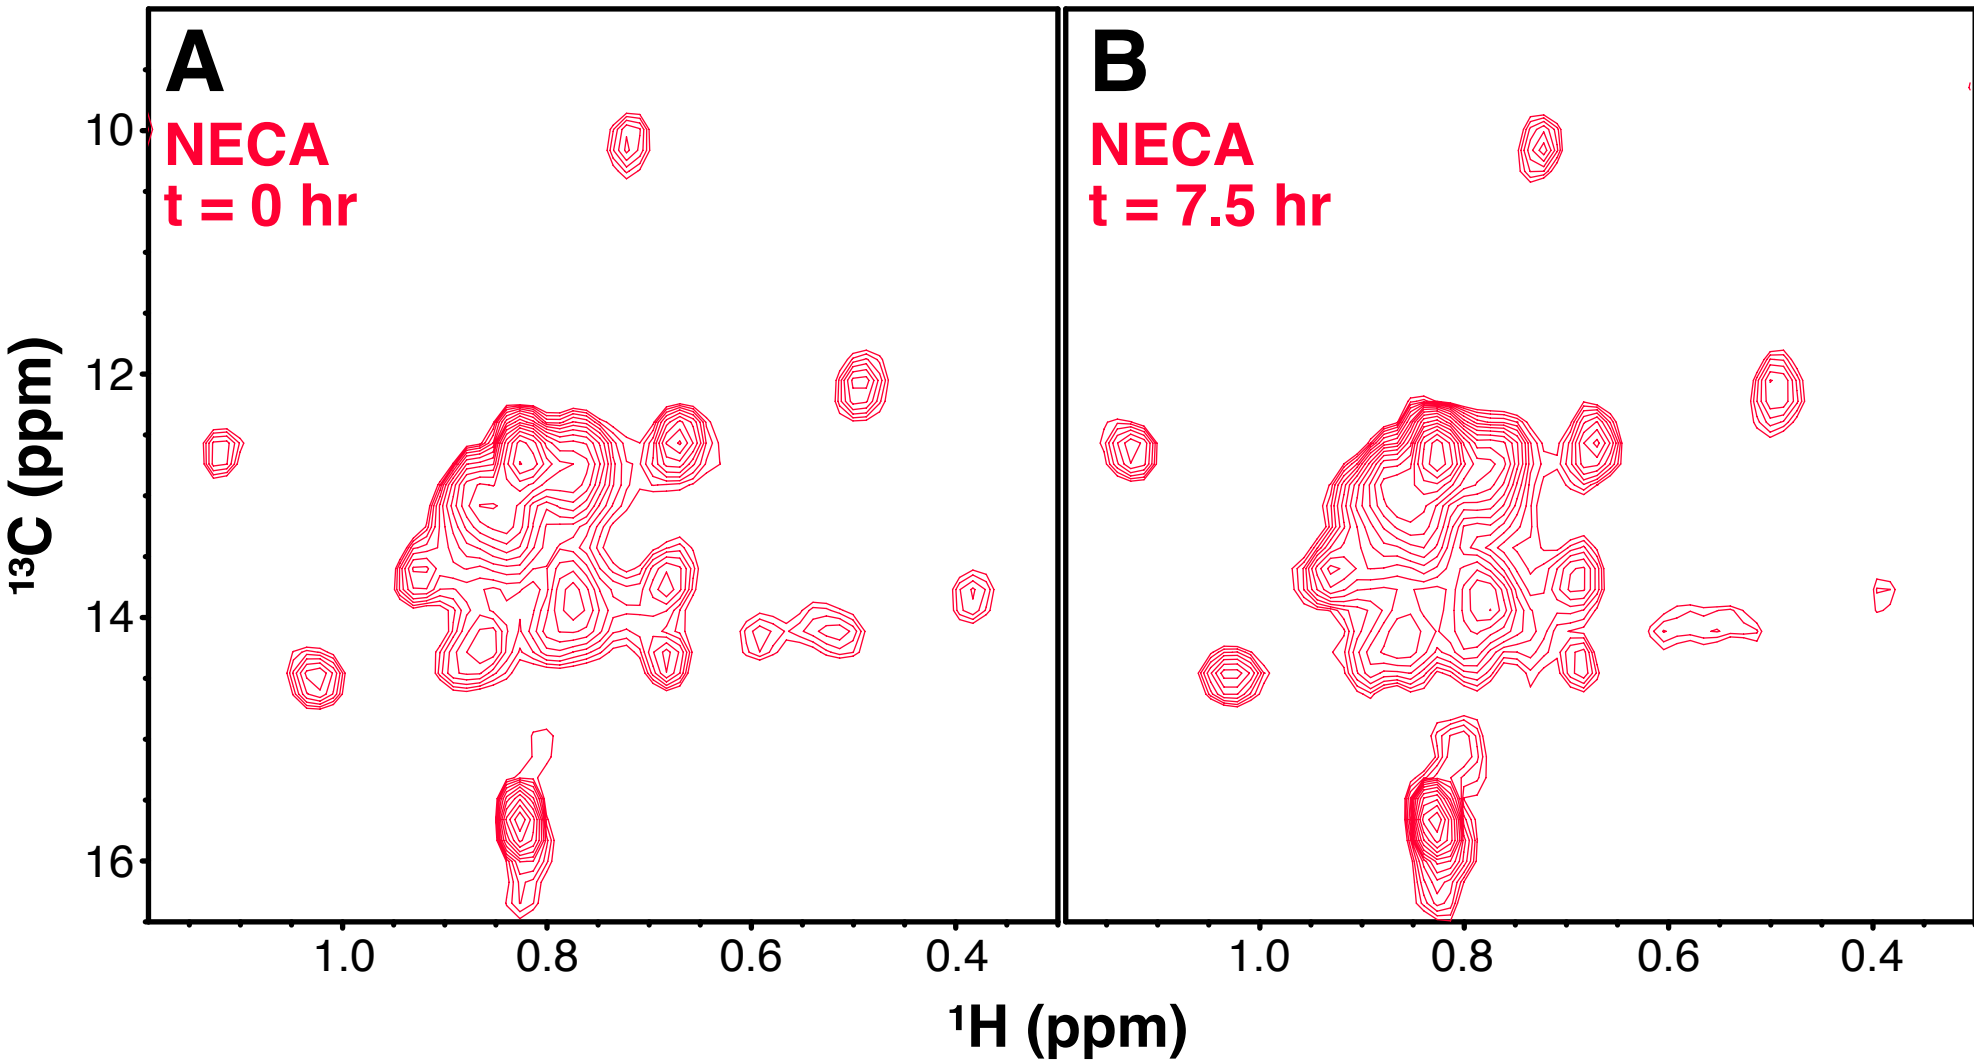

Supplement: supp [file elife-28505-supp-v1.zip]

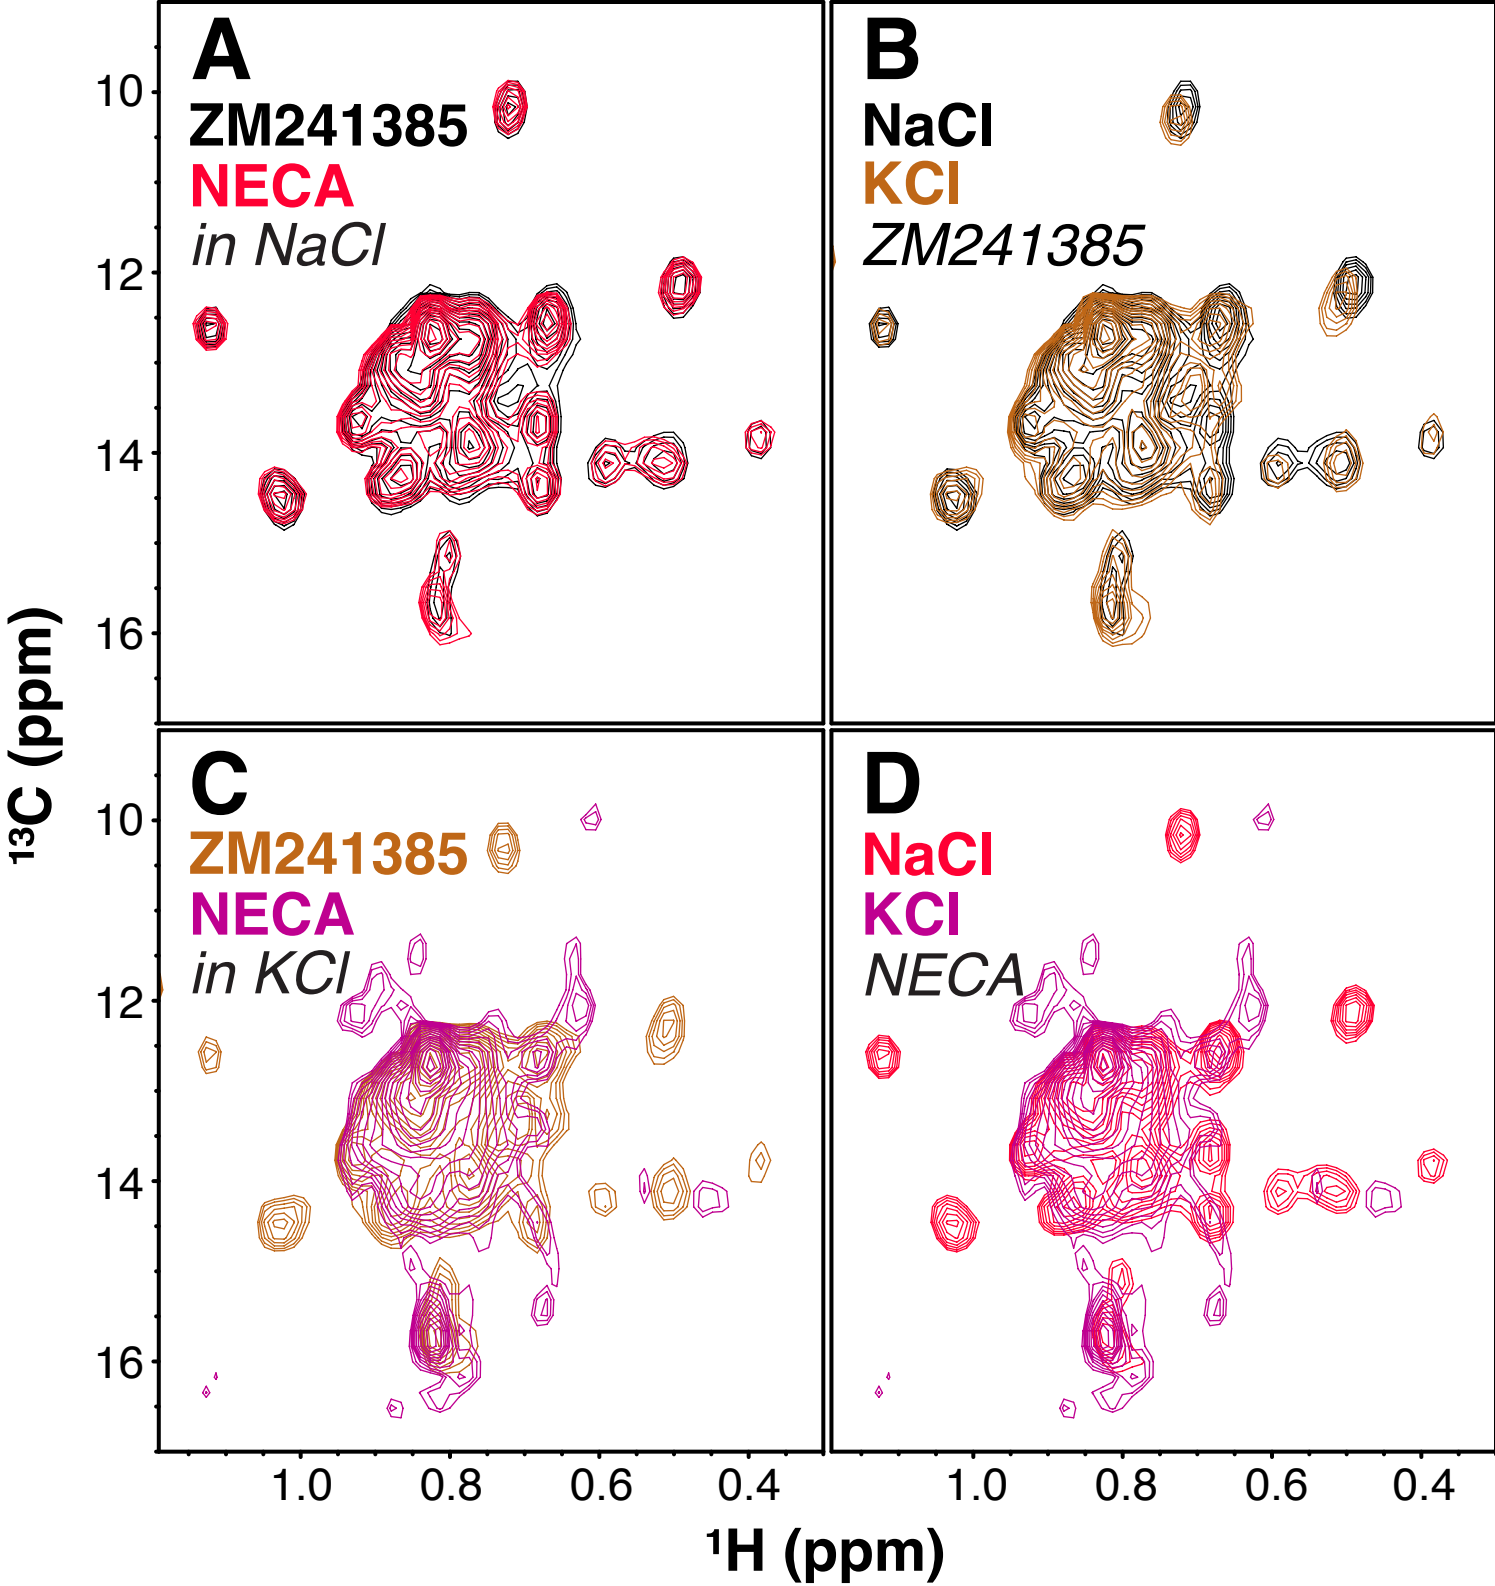

Supplement: supp [file elife-28505-supp-v1.zip]

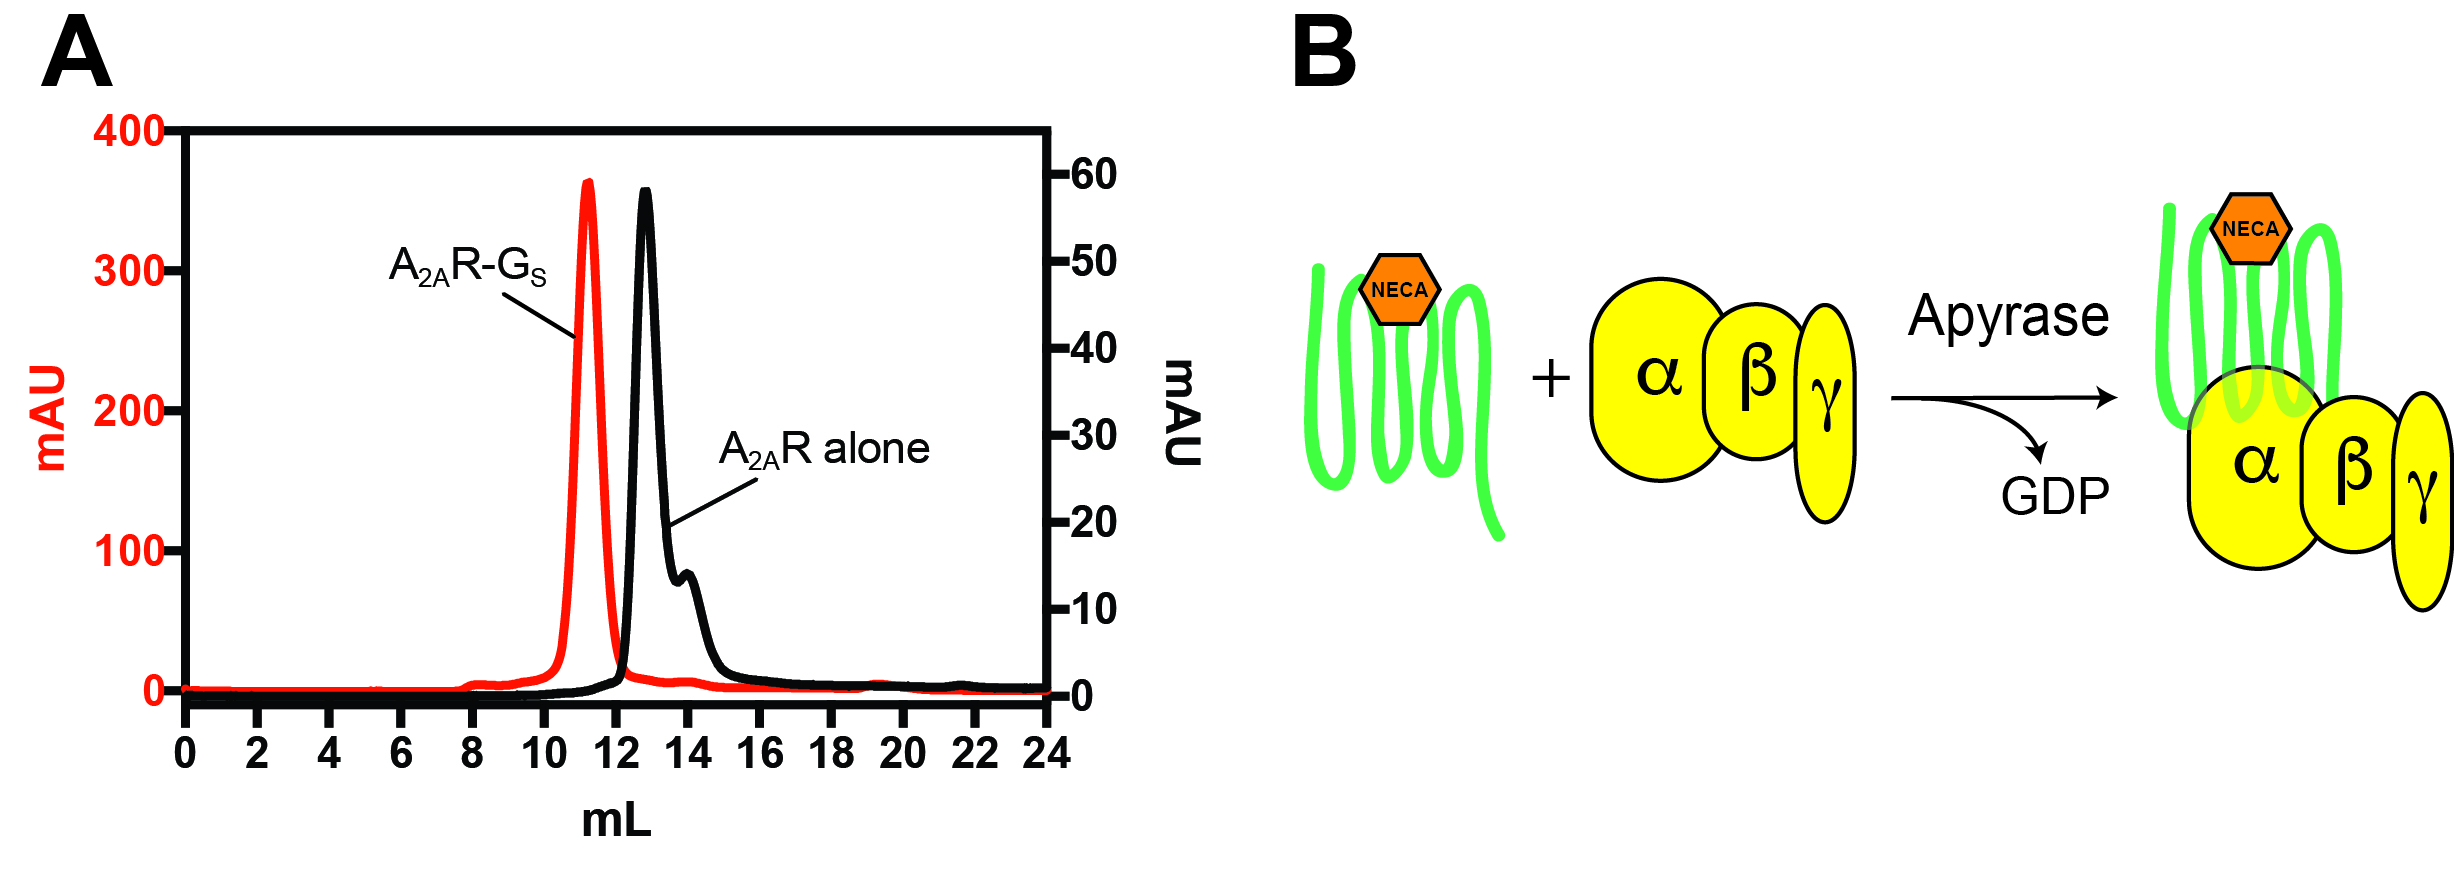

Supplement: supp [file elife-28505-supp-v1.zip › elife_poa_e28505_Figure_2_figure_supplement_1.jpg]

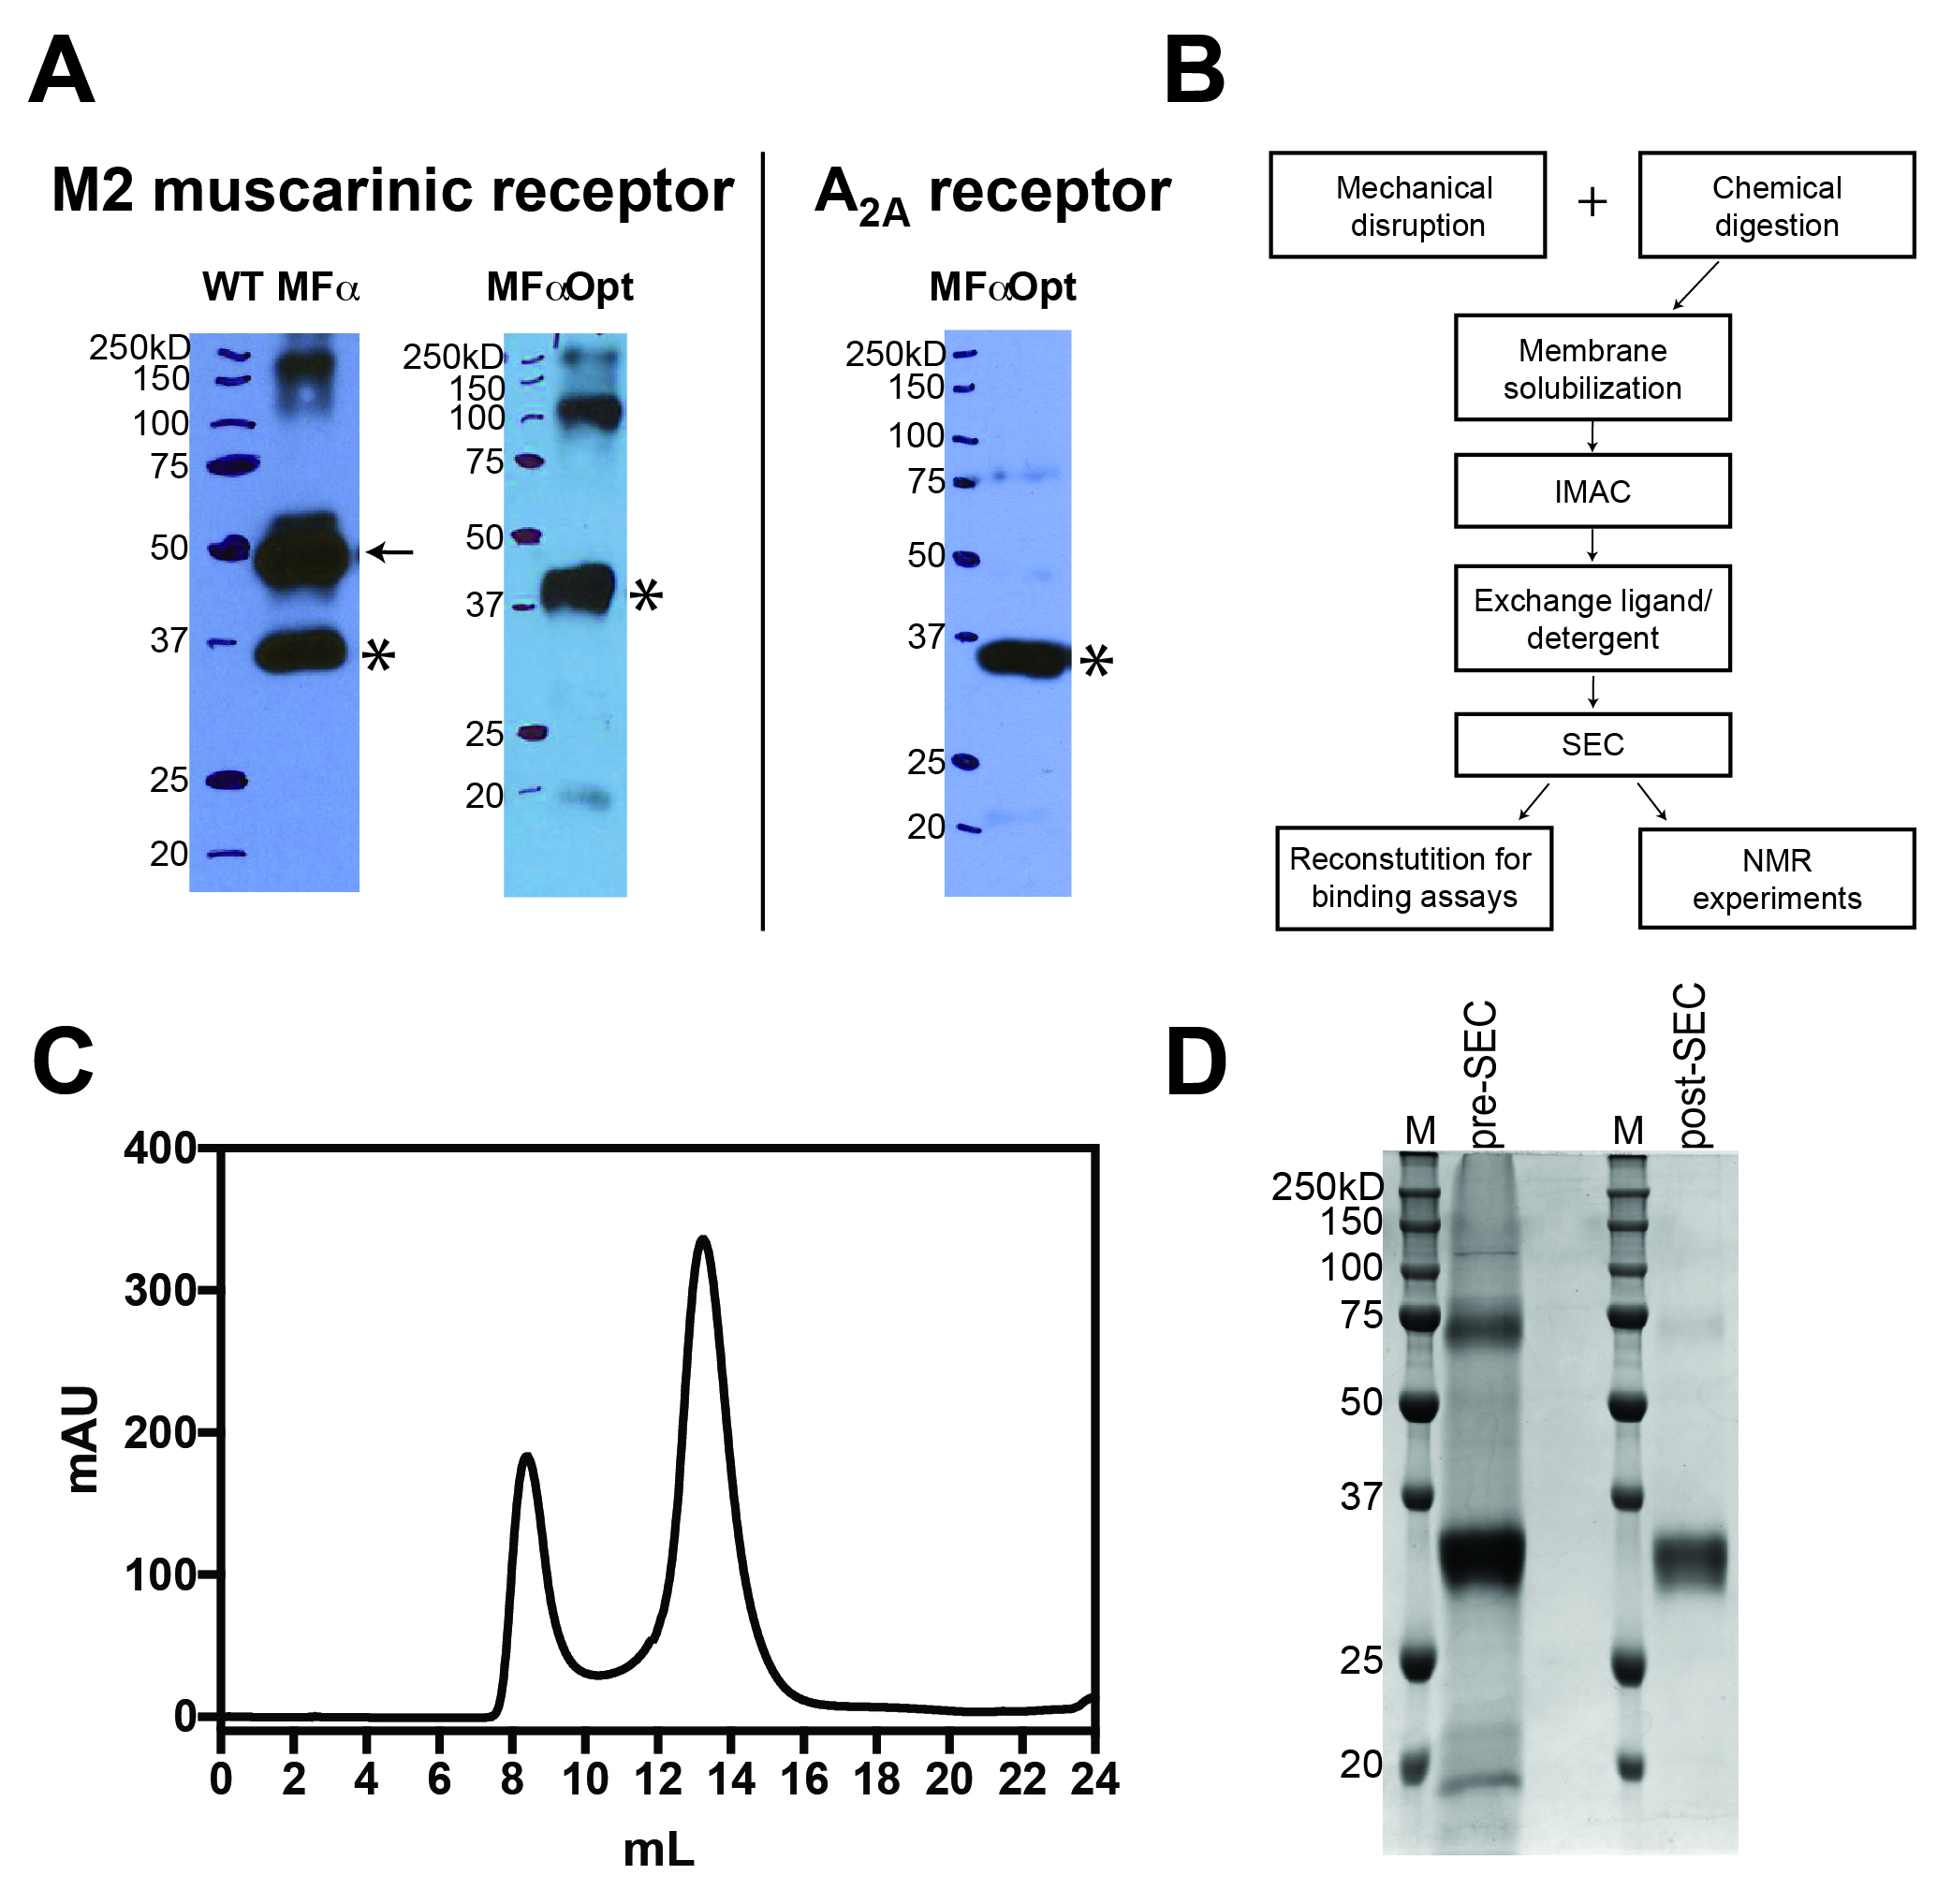

Supplement: supp [file elife-28505-supp-v1.zip › elife_poa_e28505_Figure_1_figure_supplement_1.jpg]

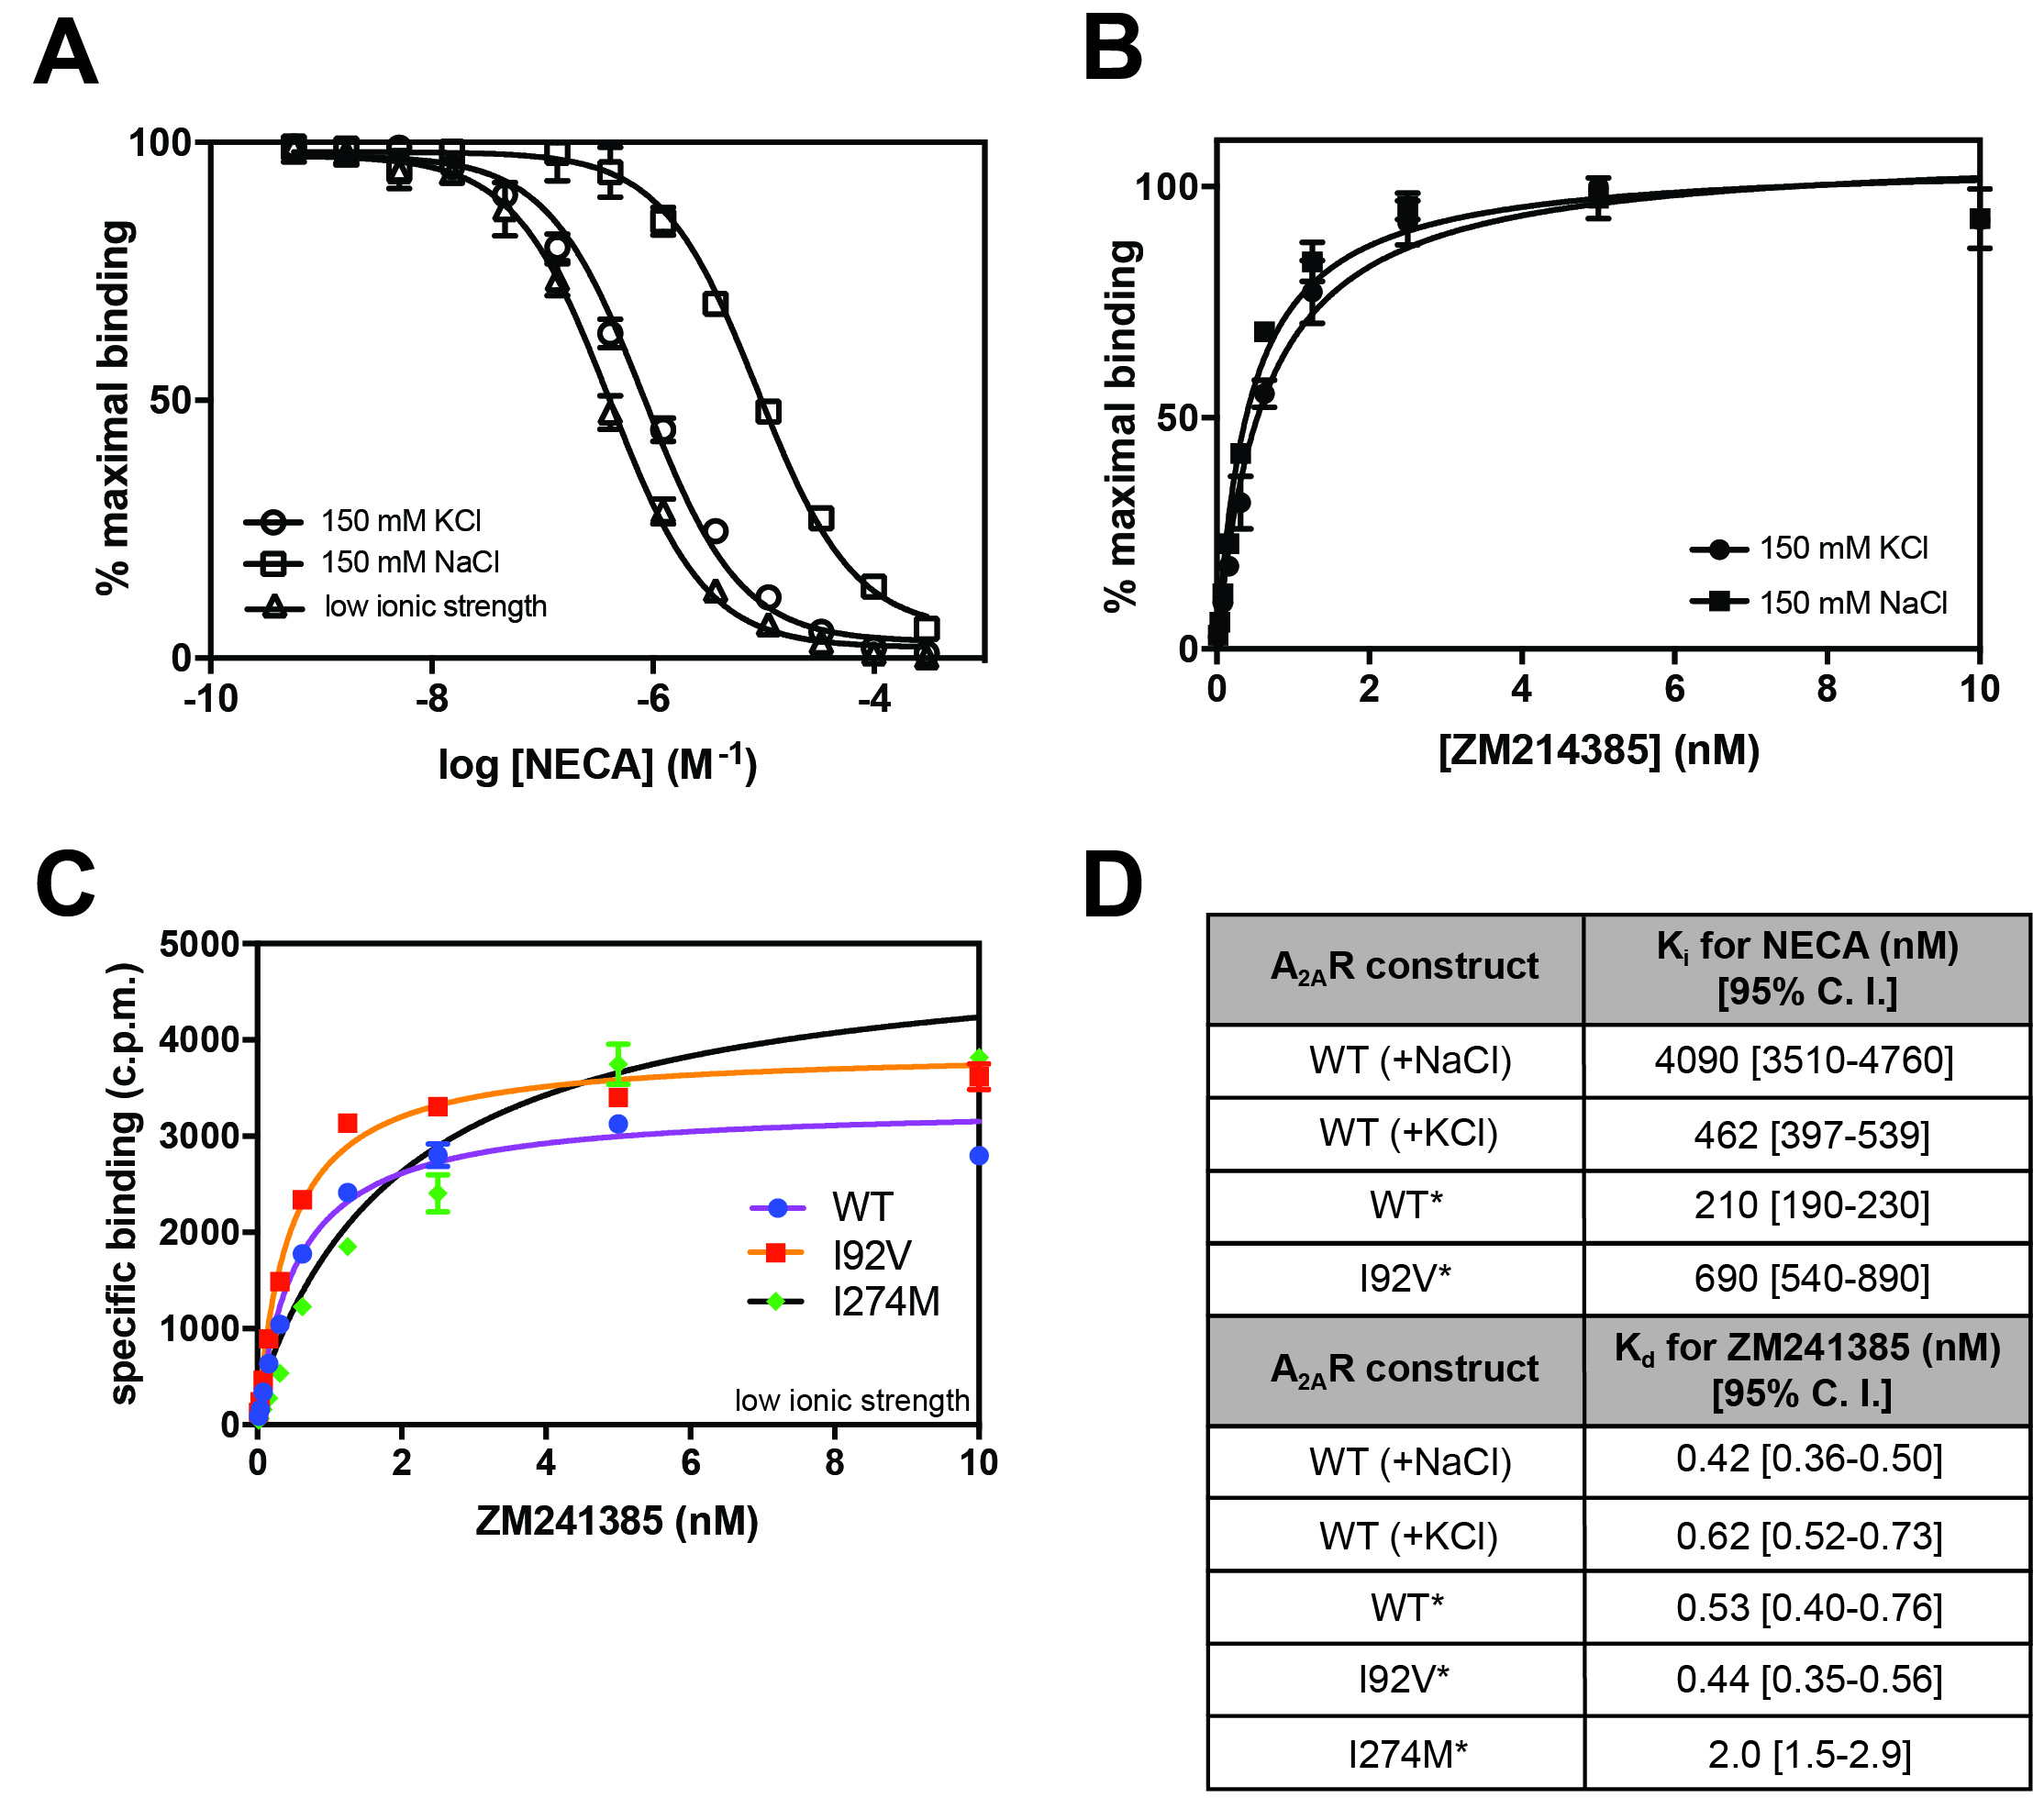

Supplement: supp [file elife-28505-supp-v1.zip › elife_poa_e28505_Figure_1_figure_supplement_2.jpg]

Traditional 3Q Methyl Relaxation Experiment

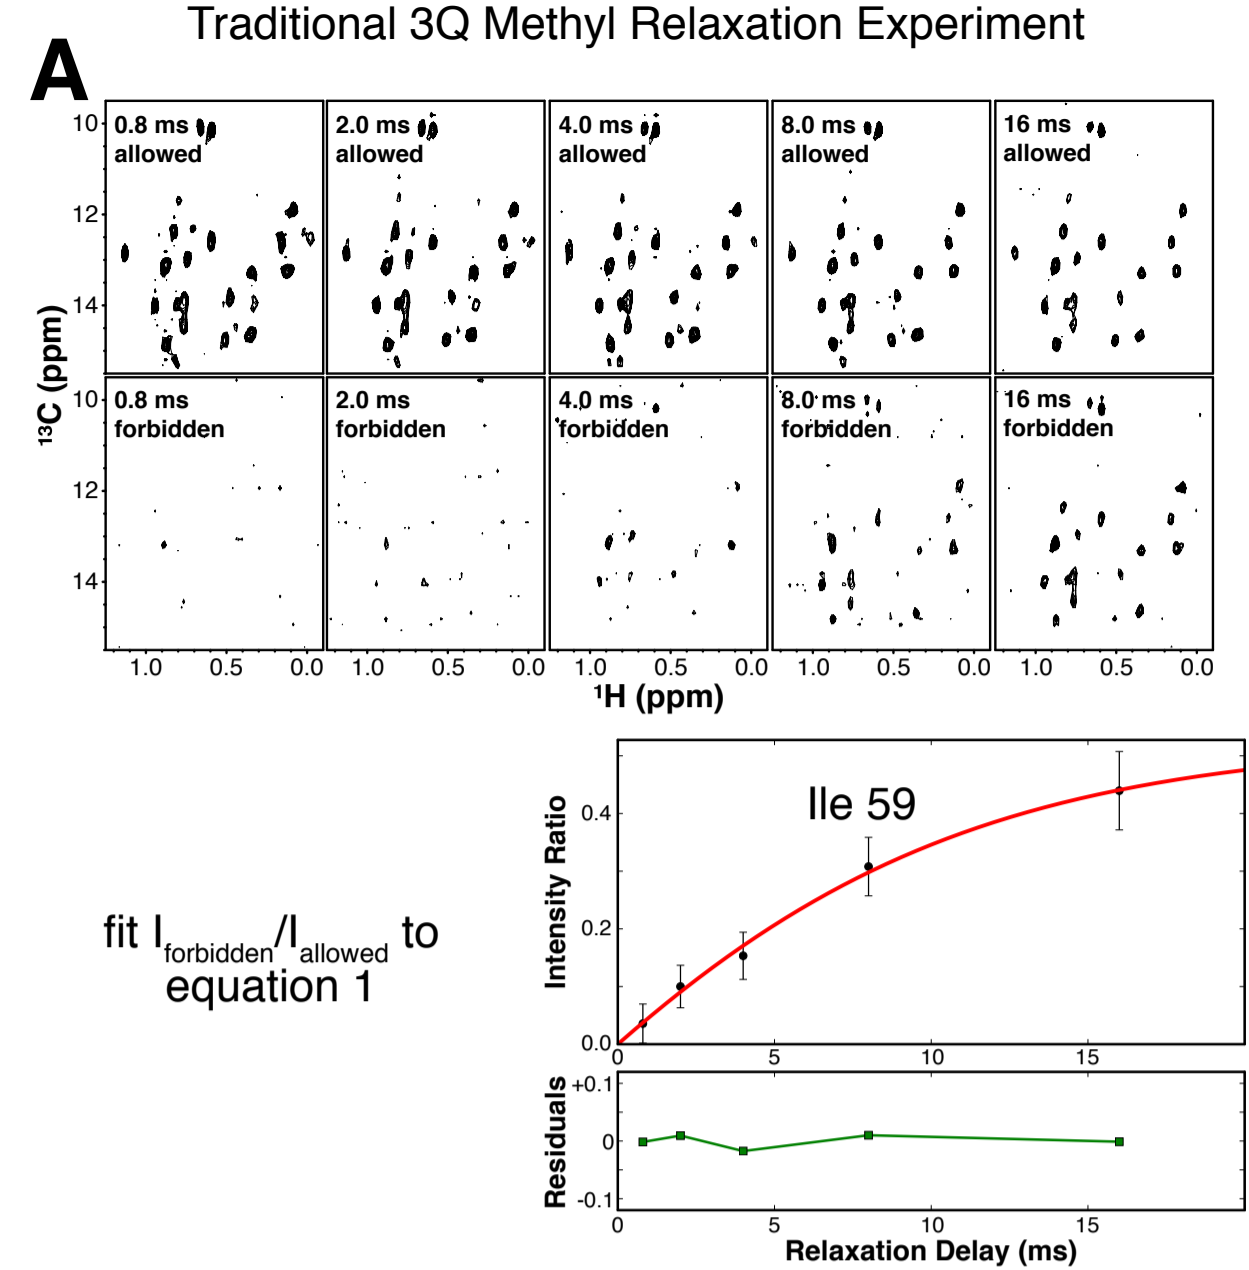

Modified 3Q Methyl Relaxation Experiment

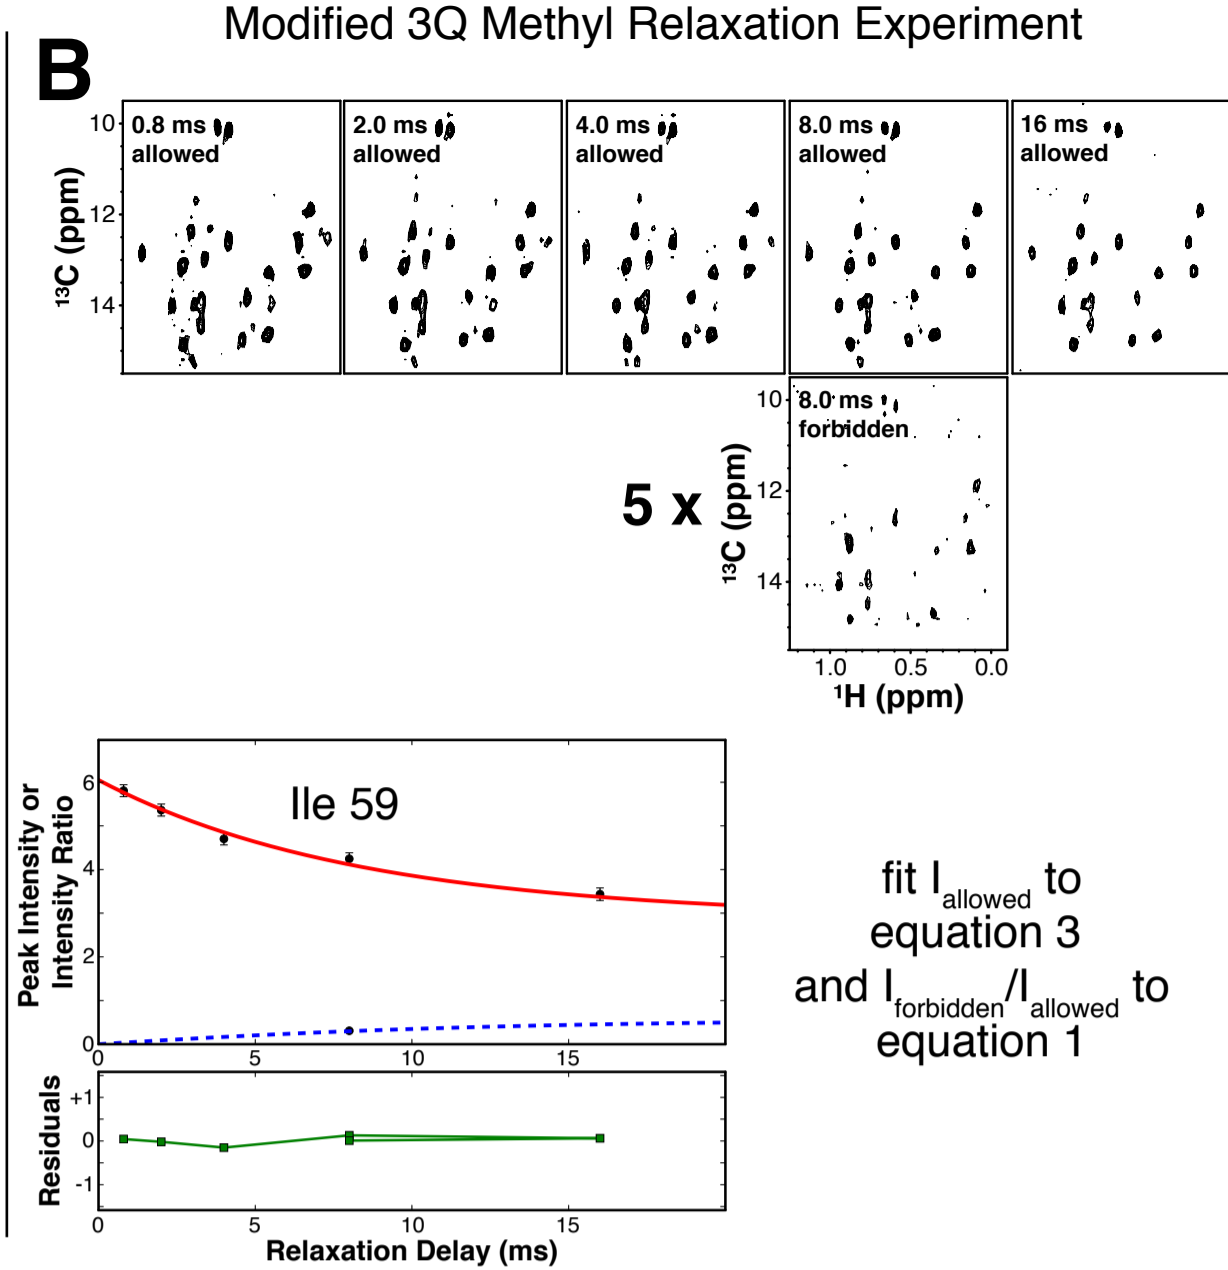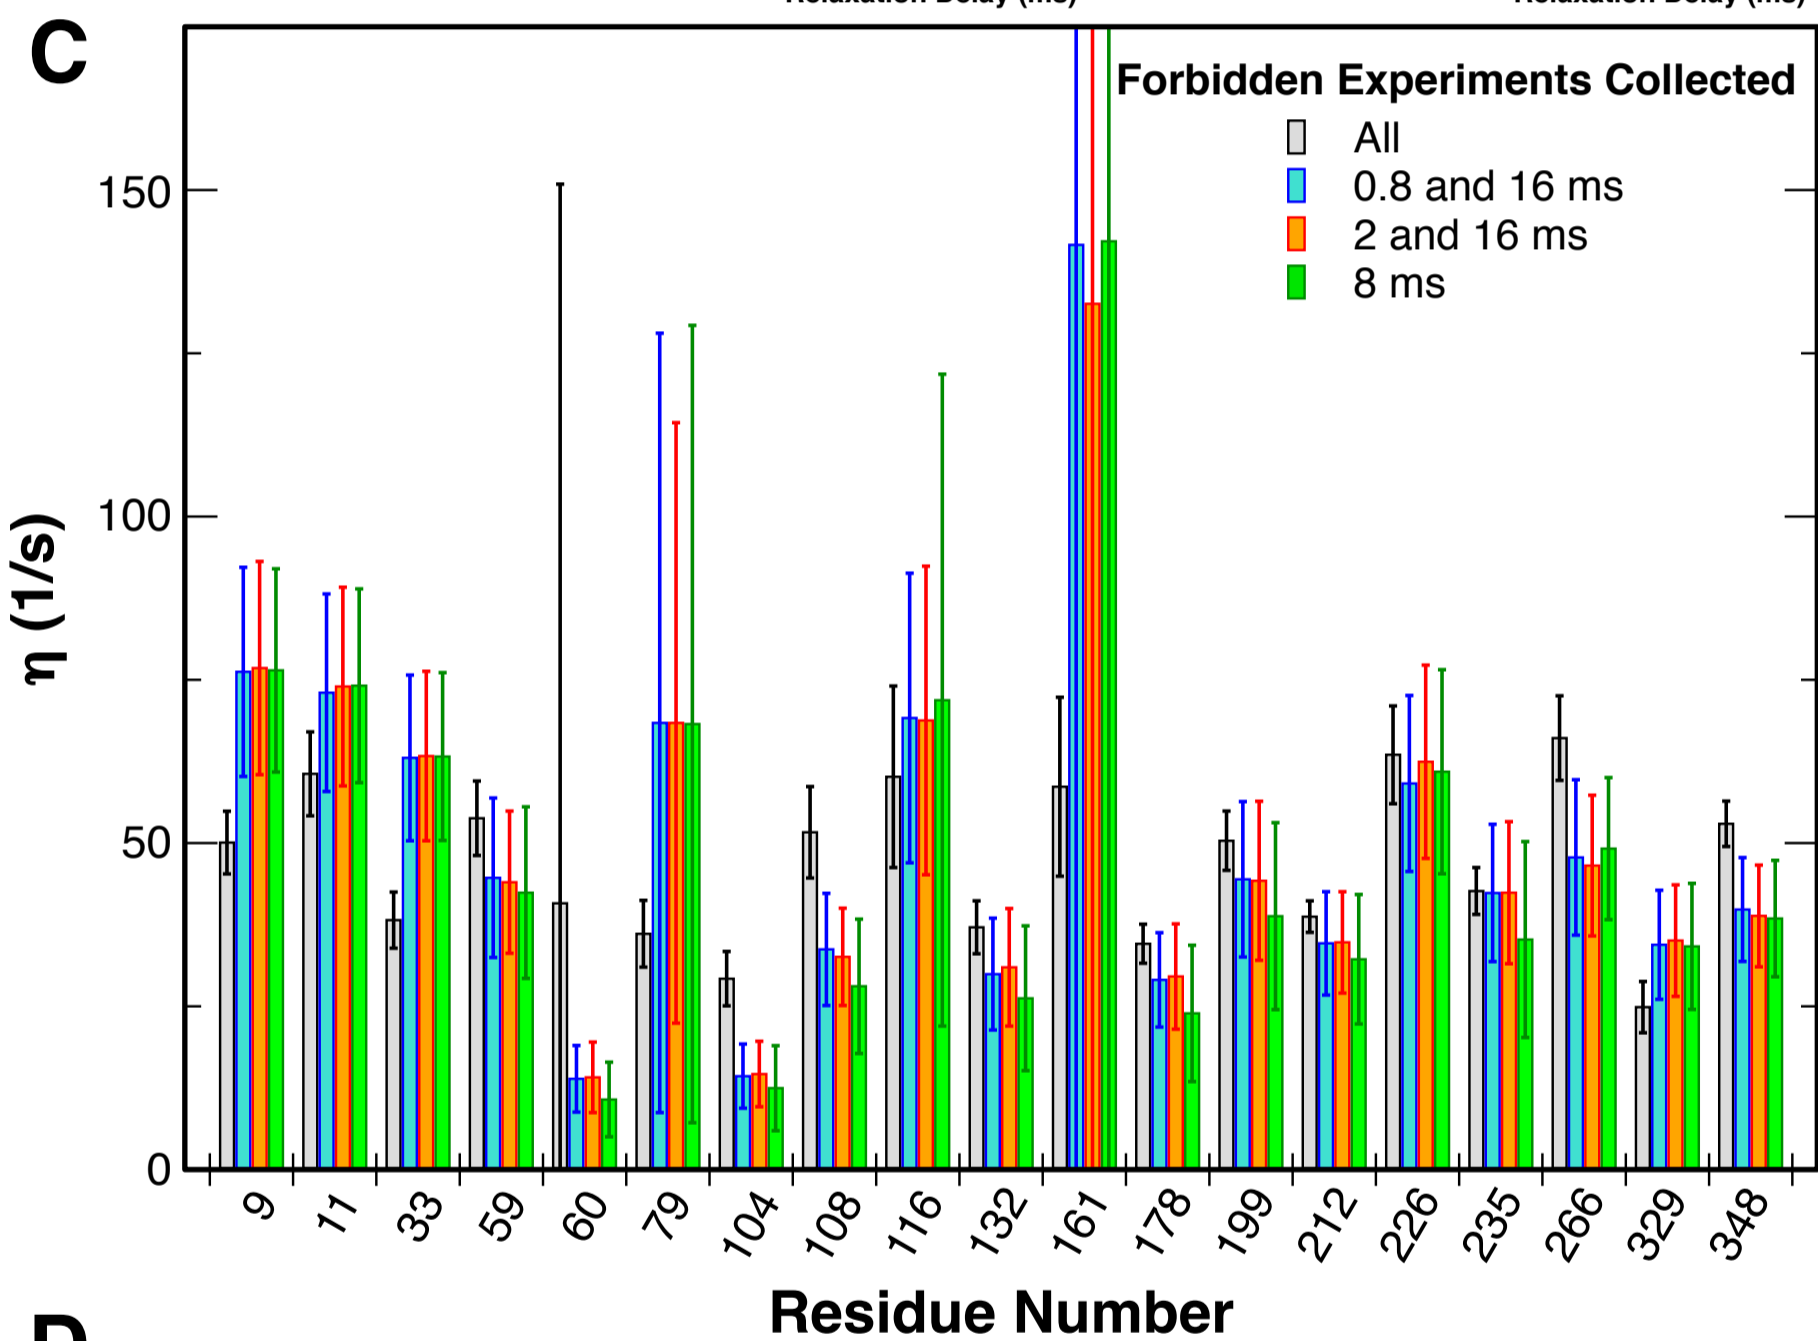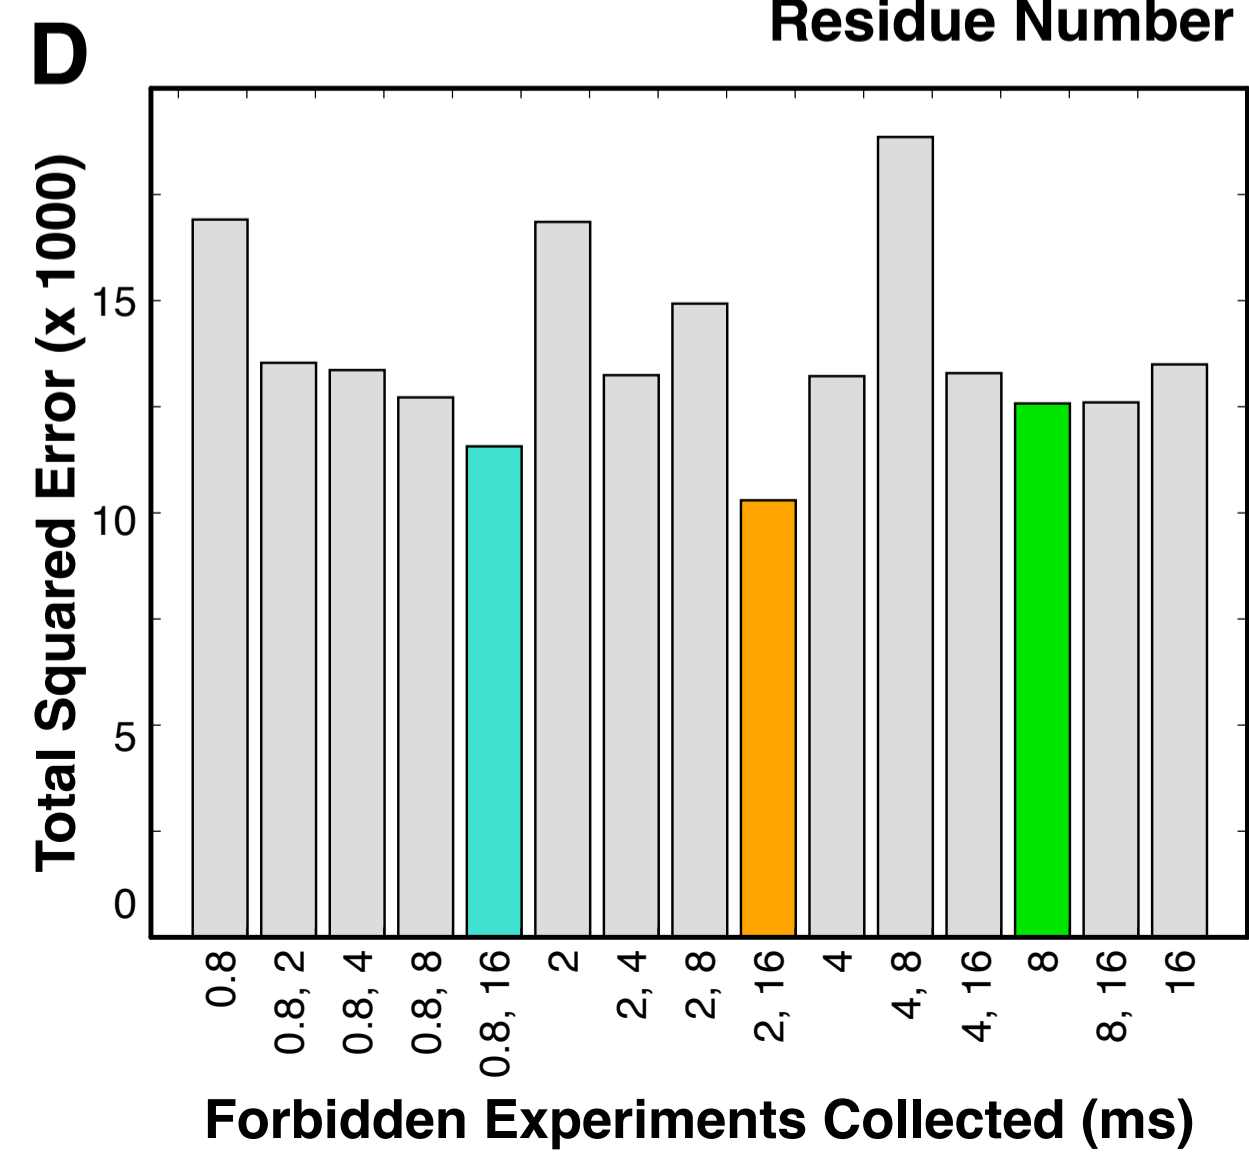

Supplement: supp [file elife-28505-supp-v1.zip › elife_poa_e28505_Figure_5_figure_supplement_1.pdf]
